# Supplementary material for: Reactions of metallodrugs with proteins: selective binding of phosphane-based platinum(ii) dichlorides to horse heart cytochrome c probed by ESI MS coupled to enzymatic cleavage
Source: Royal Society of Chemistry journal article supplement (doi:10.1039/c1mt00069a), 2011-01-01
Supplement: c1mt00069a.pdf [file c1mt00069a.pdf]

# Reactions of Metallodrugs with Proteins: Selective Binding of Phosphane-Based Platinum(II) Dichlorides to Horse Heart Cytochrome c Probed by ESI MS coupled to Enzymatic Cleavage.

## Supplementary Information

Carolin Mügge,<sup>a</sup> Elena Micheucci,<sup>b</sup> Francesca Boscaro,<sup>b</sup> Chiara Gabbiani,<sup>c</sup> Luigi Messori,<sup>\*c</sup> and Wolfgang Weigand<sup>\*a</sup>

<sup>a</sup>Institute of Inorganic and Analytical Chemistry, Friedrich-Schiller-University Jena, August-Bebel-Strasse 2, 07743 Jena, Germany, Fax: (+49) 3641 948102, E-mail: wolfgang.weigand@uni-jena.de

<sup>b</sup>Mass Spectrometry Center (CISM), University of Florence, Via U. Schiff 6, 50019 Sesto Fiorentino, Firenze, Italy

<sup>c</sup>Laboratory of Metals in Medicine, Department of Chemistry, University of Florence, Via della Lastruccia 3, 50019 Sesto Fiorentino, Firenze, Italy, Fax: (+39) 055 4573385, E-mail: luigi.messori@unifi.it

## Contents

### Experimental details

General

Recording of ESI MS spectra

### Figures

- Fig. S1** Deconvoluted ESI-MS spectra of (Me<sub>3</sub>P)<sub>2</sub>PtCl<sub>2</sub> and (Et<sub>3</sub>P)<sub>2</sub>PtCl<sub>2</sub> after 96h incubation with cyt c (3:1 ratio)
- Fig. S2** Experimental and theoretical isotopic pattern for the fragment [cyt c(G1-T49)<sup>+</sup> + C<sub>36</sub>H<sub>90</sub>P<sub>6</sub>Pt<sub>3</sub><sup>6+</sup>]<sup>7+</sup> at charge state +7
- Fig. S3** Trypsin digestion pattern of free and platinated cyt c.
- Fig. S4** Experimental and theoretical isotopic pattern for the fragment [cyt c(G23-R38) + 2Pt(PEt<sub>3</sub>)<sub>2</sub><sup>2+</sup> - 2H<sup>+</sup>]<sup>2+</sup> at charge state +2.
- Fig. S5** Experimental and theoretical isotopic pattern for the fragment [cyt c(C14-K22)<sup>+</sup> + Pt(PEt<sub>3</sub>)<sub>2</sub><sup>2+</sup> - 1H<sup>+</sup>]<sup>2+</sup> at charge state +2.
- Fig. S6** Deconvoluted ESI-MS spectra of (Me<sub>3</sub>P)<sub>2</sub>PtCl<sub>2</sub> and (Et<sub>3</sub>P)<sub>2</sub>PtCl<sub>2</sub> after 96h incubation with HEWL (3:1 ratio).

## Experimental Details

### General

All syntheses were carried out using standard vacuum-line and Schlenk techniques under argon atmosphere. All chemicals and solvents used were obtained from commercial suppliers and were used as received: horse heart cytochrome c (Sigma C7752); hen egg white lysozyme (Sigma L7651); endoproteinase Asp-N (Sigma, P3303); Trypsin (Promega, V5111); NH<sub>4</sub>HCO<sub>3</sub> (Fluka, 09830). The diphosphane Pt(II) dichloride complexes were prepared from dichloro-(1,5-cyclooctadienyl)-platinum(II) similar to literature procedures<sup>9</sup>. Stock solutions of **1** and **2** for the protein interaction studies were prepared in DMSO.

### Recording of the ESI MS spectra

The incubated samples were diluted with water (20-fold dilution). ESI-MS spectra were recorded via direct introduction of the samples (flow rate 5 µL/min) in an LTQ-Orbitrap high-resolution mass spectrometer (Thermo, San Jose, CA, USA), equipped with a conventional ESI source. The spectrometer's working conditions were: spray voltage 3.1 kV, capillary voltage 45 V and capillary temperature 220 °C. The sheath and the auxiliary gases were set, respectively, at 17 (arbitrary units) and 1 (arbitrary units). For acquisition, Xcalibur 2.0 software (Thermo) was used; monoisotopic and average deconvoluted masses were obtained by using the integrated Xtract tool. A nominal resolution (at m/z 400) of 100.000 was used for spectrum acquisition.

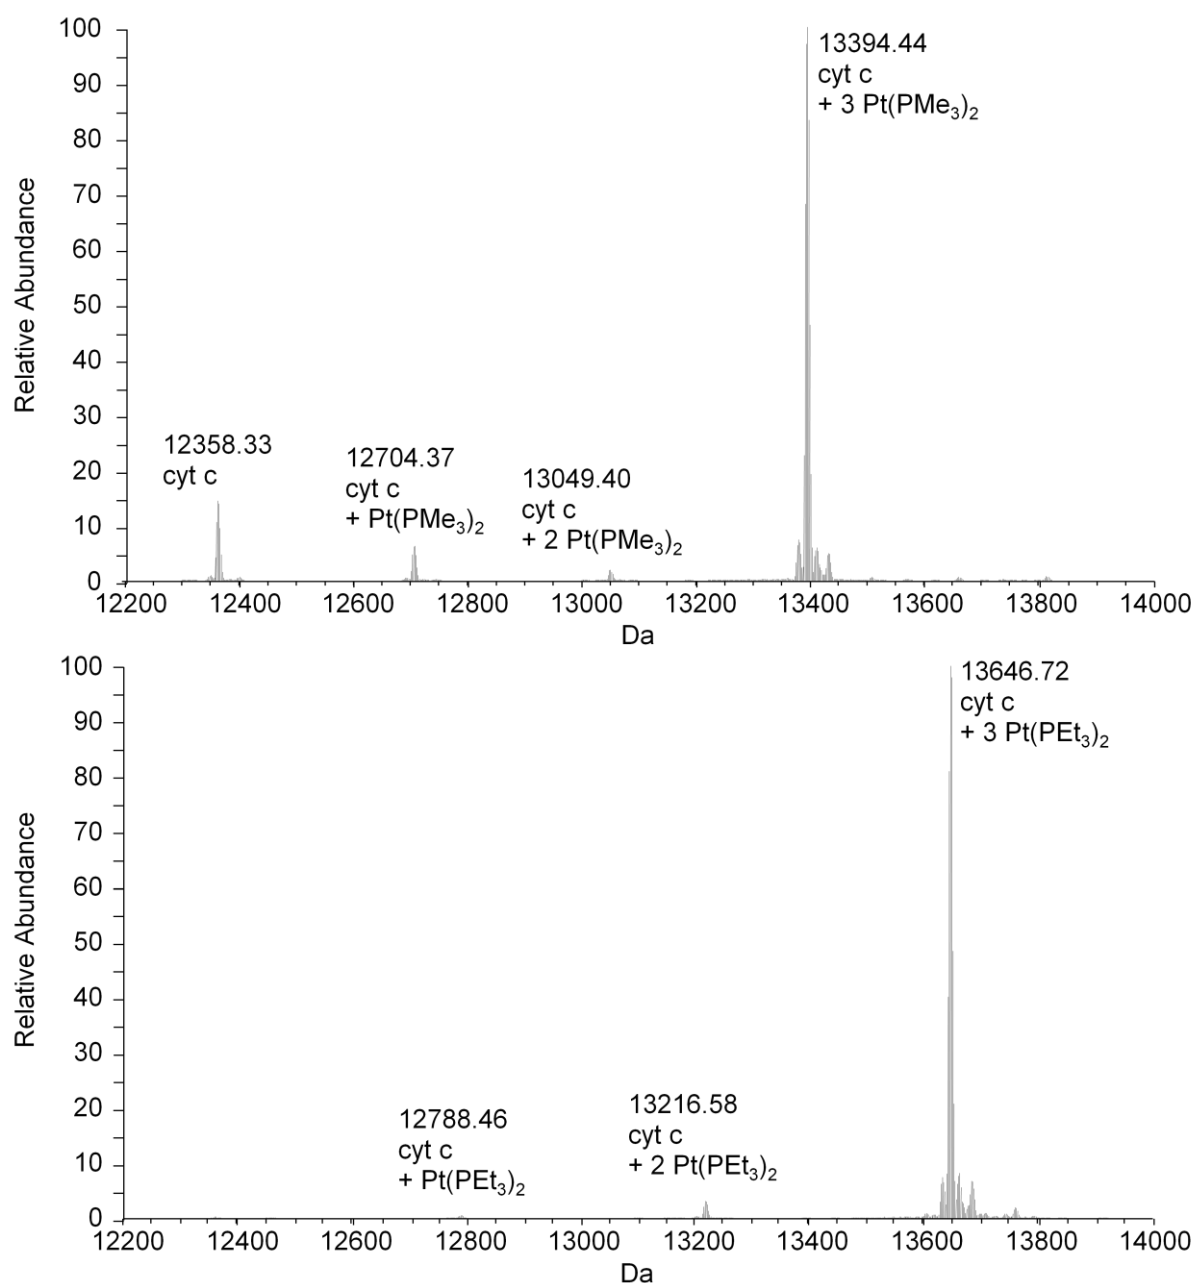

**Fig. S1** Deconvoluted ESI-MS spectra of  $(\text{Me}_3\text{P})_2\text{PtCl}_2$  (top) and  $(\text{Et}_3\text{P})_2\text{PtCl}_2$  (bottom) after 96h incubation with cyt c (3:1 ratio). Both compounds show clear preference to form 3:1 adducts.

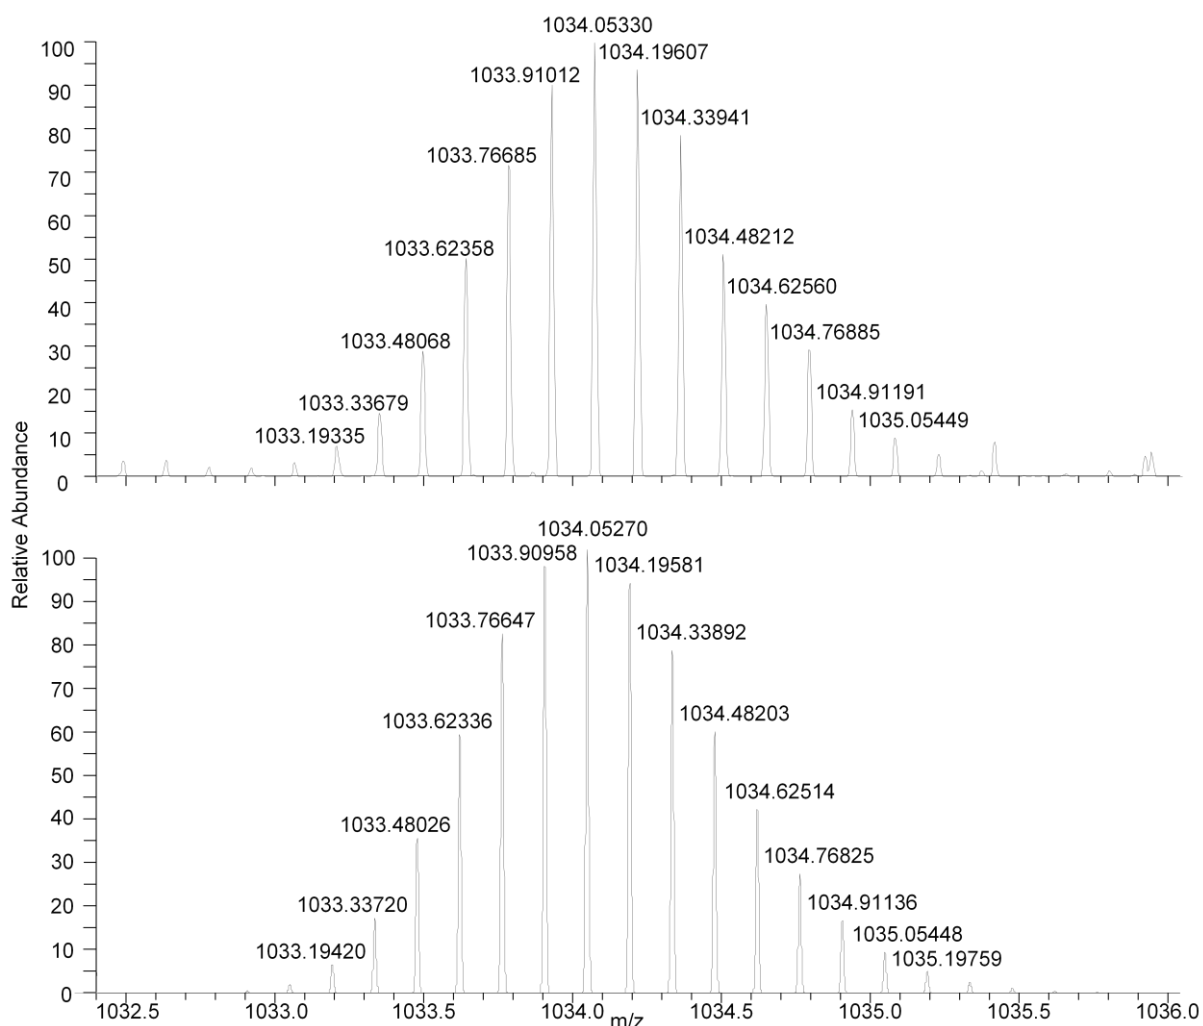

**Fig. S2** Experimental (top) and theoretical (bottom) isotopic pattern for the fragment  $[\text{cyt c(G1-T49)}^+ + \text{C}_{36}\text{H}_{90}\text{P}_6\text{Pt}_3^{6+}]^{7+}$  at charge state +7. Binding of 3 units  $\text{Pt}(\text{PEt}_3)_2$  to the segment of cyt c with amino acids 1-49 is proven.

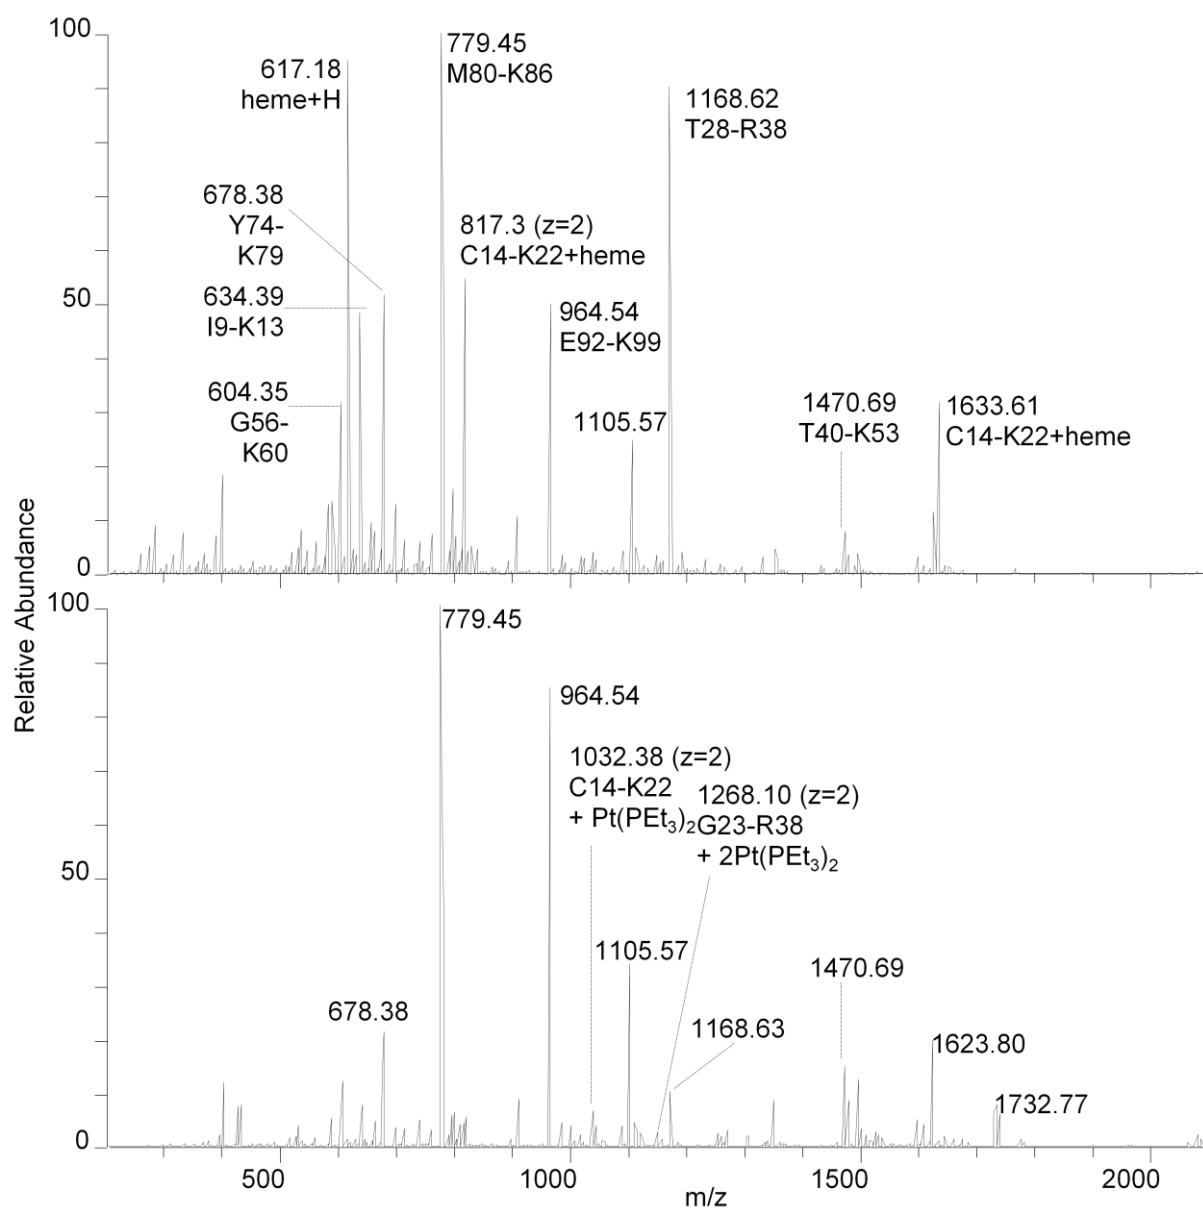

**Fig. S3** Trypsin digestion pattern of free (top) and platinated (bottom) cyt c. The main signals are assigned according to literature.<sup>1,2</sup>

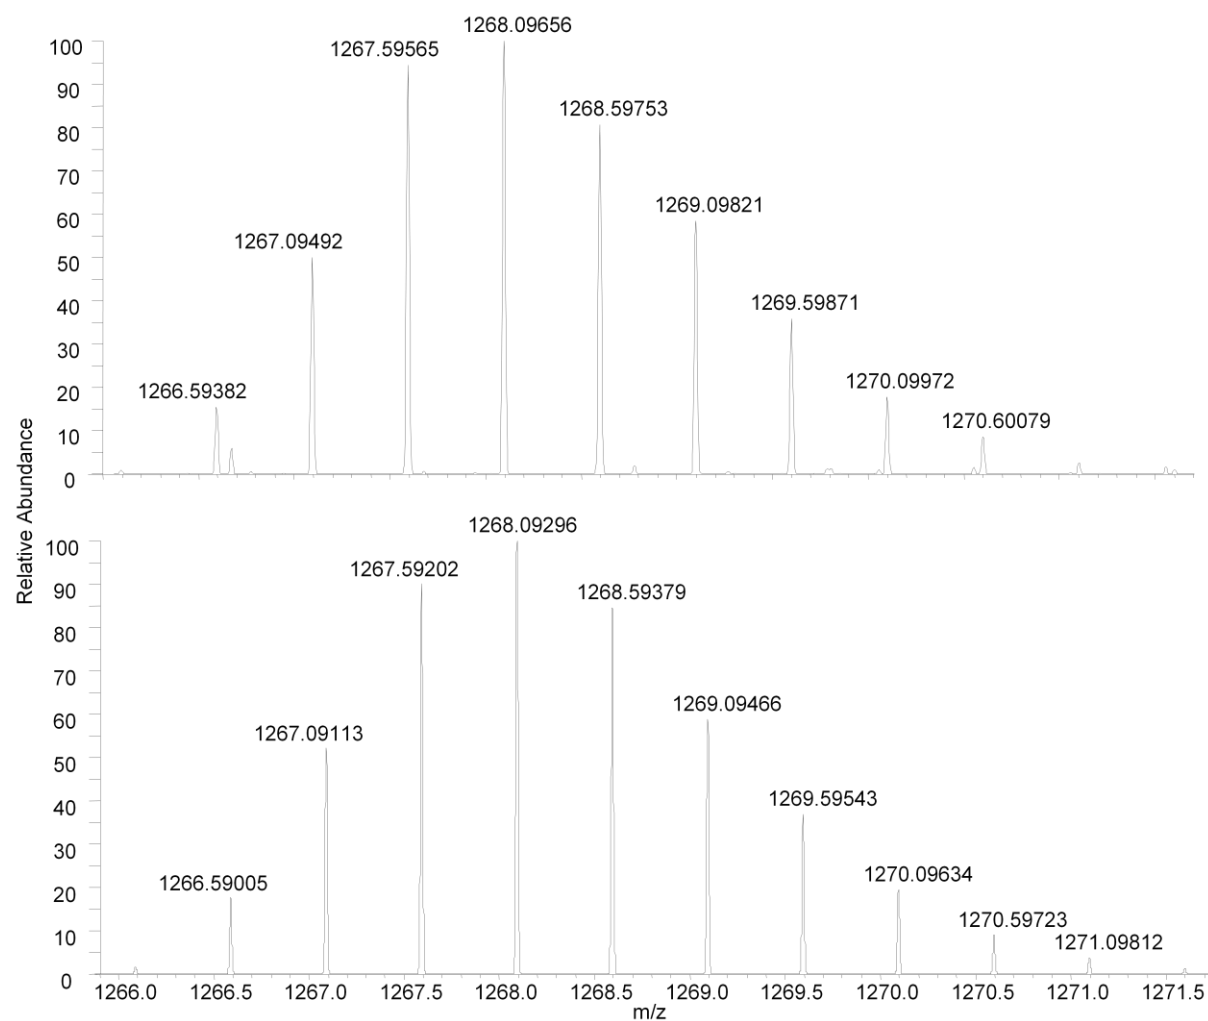

**Fig. S4** Experimental (top) and theoretical (bottom) isotopic pattern for the fragment  $[\text{cyt c(G23-R38)} + 2\text{Pt(PEt}_3)_2^{2+} - 2\text{H}^+]^{2+}$  at charge state +2. Amino acids H26 and H33 are determined possible binding sites for Pt.

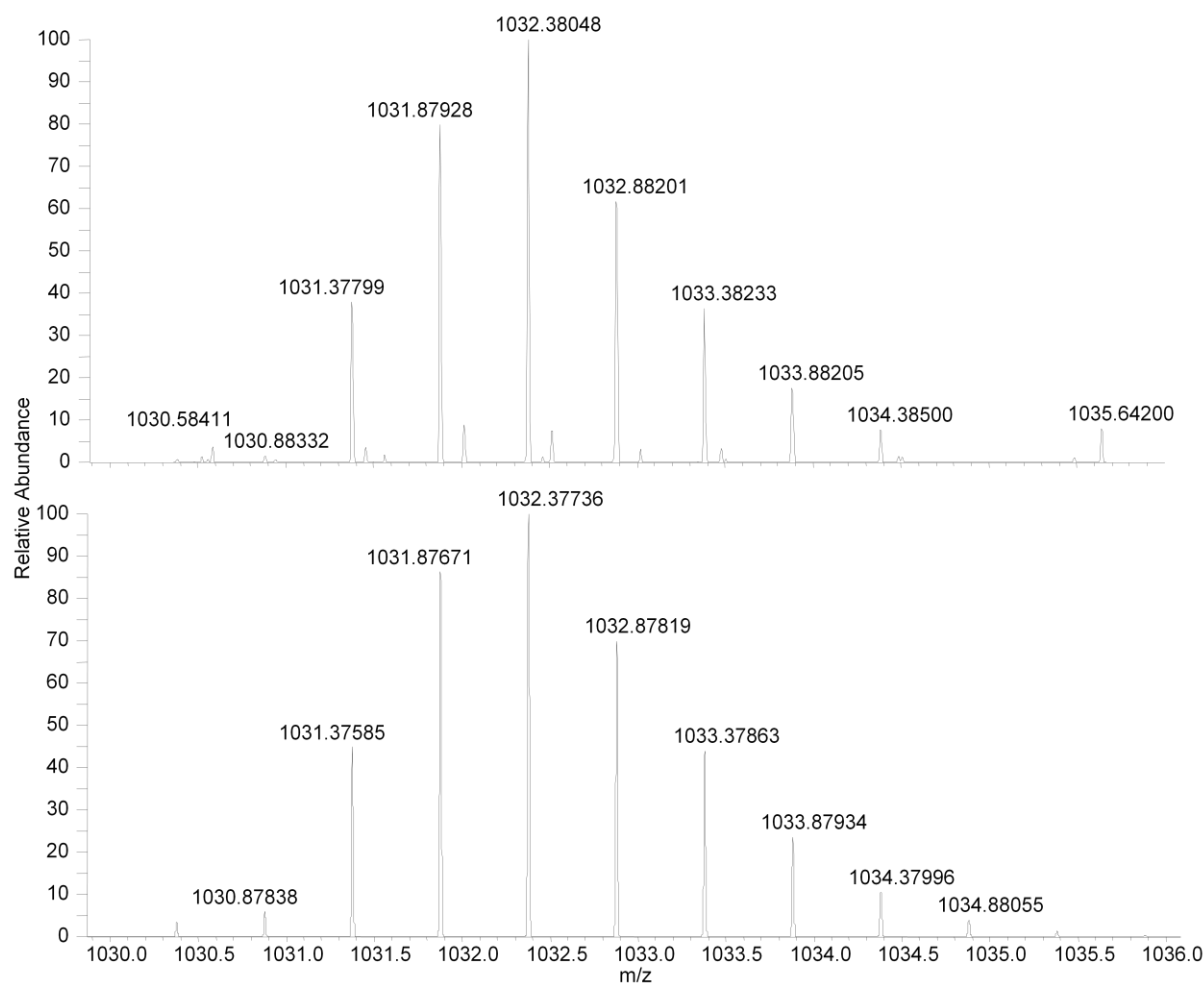

**Fig. S5** Experimental (top) and theoretical (bottom) isotopic pattern for the fragment  $[\text{cyt c(C14-K22)}^+ + \text{Pt(PEt}_3)_2^{2+} - 1\text{H}^+]^{2+}$  at charge state +2. Amino acid H18 is assigned as binding site, since the two cysteines, C14 and C17, are still covalently bound to the heme group.

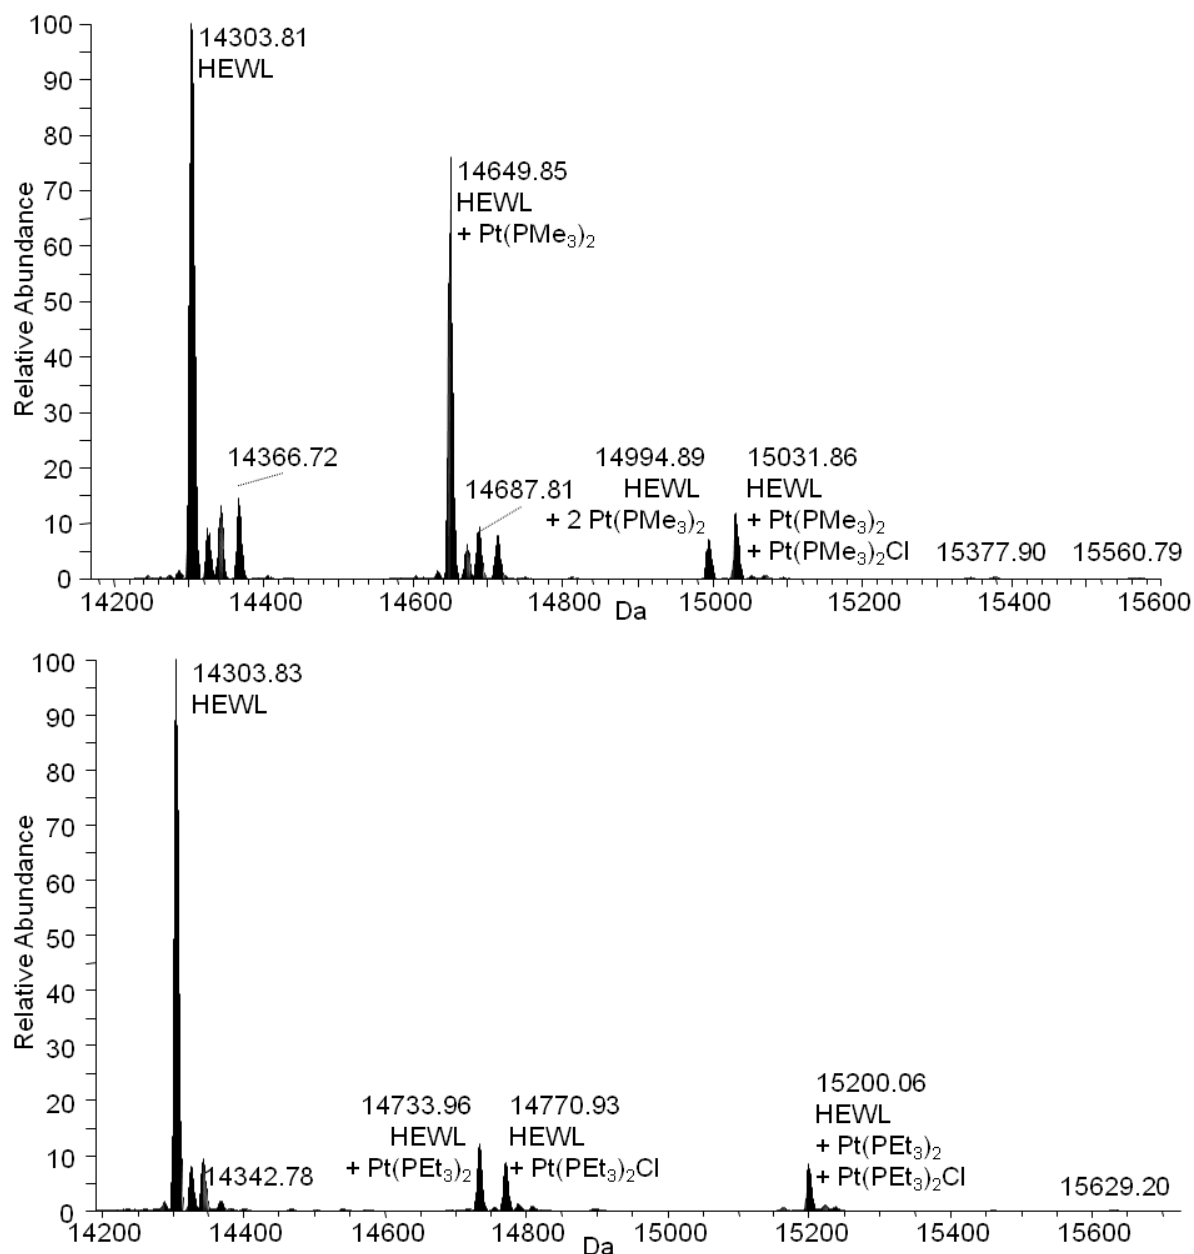

**Figure S6.** Deconvoluted ESI-MS spectra of  $(\text{Me}_3\text{P})_2\text{PtCl}_2$  (top) and  $(\text{Et}_3\text{P})_2\text{PtCl}_2$  (bottom) after 96h incubation with HEWL (3:1 ratio). Both compounds show interaction with HEWL to a much lesser and less defined extent than when incubated with cyt c.

## Literature:

1. S. C. Henderson, S. J. Valentine, A. E. Counterman, and D. E. Clemmer, *Anal. Chem.*, 1999, 71, 291-301.
2. J. M. Busnel, S. Descroix, T. Le Saux, S. Terabe, M. C. Hennion, and G. Peltre, *Electrophoresis*, 2006, 27, 1481-1488.
